# Supplementary material
Source: HighWire-hosted journal article supplement (https://www.cmajopen.ca/highwire/filestream/90637/field_highwire_adjunct_files/2/open-2023-0023-original-submission.pdf)
Supplement: open-2023-0023-original-submission.pdf [file open-2023-0023-original-submission.pdf]

# Budget impact analysis of adopting primary care-based COPD case detection in the Canadian general population

Rachael Mountain, MSc<sup>1,2</sup>, Kate M. Johnson, PhD<sup>1,3</sup>

## **Affiliations:**

1. Collaboration for Outcomes Research and Evaluation, Faculty of Pharmaceutical Sciences, University of British Columbia, Vancouver BC
2. Centre for Health Informatics, Computing, and Statistics, Lancaster Medical School, Lancaster University, Lancaster UK
3. Division of Respiratory Medicine, Department of Medicine, University of British Columbia, Vancouver BC

## **Corresponding author:**

Kate M. Johnson  
Email: kate.johnson@ubc.ca

## **Funding statement:**

Financial support for this study was provided by Mitacs via Mitacs Globalink Research Award (application reference number 32858).

## **Competing interests:**

Both authors declare that they have no conflicts of interest.

## **Abstract**

**Background:** An estimated 70% of Canadians with chronic obstructive pulmonary disease (COPD) are undiagnosed, creating a barrier to early intervention. There is growing interest in the value of primary care-based opportunistic case detection for COPD. We build on a previous cost-effectiveness analysis by evaluating the budget impact of adopting COPD case detection in the Canadian general population.

**Methods:** We used a validated discrete-event microsimulation model of COPD in the Canadian general population  $\geq 40$  years to assess the costs of implementing eight primary care-based case detection strategies over a five-years (2022-2026) from the healthcare payer perspective. Strategies varied in eligibility criteria (based on age, symptoms, or smoking history) and testing technology (COPD Diagnostic Questionnaire (CDQ) or screening spirometry). Costs were determined from Canadian studies and converted to 2021 Canadian dollars. Key parameters were varied in one-way sensitivity analysis.

**Results:** All strategies resulted in higher total costs compared to routine diagnosis. The most cost-effective scenario (the CDQ for all patients) had an associated total budget expansion of \$427 million, with administering case detection and subsequent diagnostic spirometry accounting for 86% of costs. This strategy increased the proportion of COPD individuals diagnosed from 30.4% to 37.8% and resulted in 4.6 million referrals to diagnostic spirometry. Results were most sensitive to uptake in primary care.

**Interpretation:** Adopting a national COPD case detection programme would be an effective method for increasing diagnosed COPD dependent on successful uptake, but it will require prioritisation by budget holders and substantial additional investment to improve access to diagnostic spirometry.

## **1. Introduction**

Chronic obstructive pulmonary disease (COPD) affects 2.6 million Canadians and is the third leading cause of death worldwide (1,2). Despite being a major public health concern, 70% of Canadians with COPD remain undiagnosed, representing a missed opportunity to reduce symptoms and the risk of exacerbations through optimal preventative and therapeutic management, particularly smoking cessation (4,5). Studies have shown that individuals with undiagnosed COPD have similar levels of health service use compared to diagnosed patients yet experience worse long-term health outcomes through late recognition of their condition (4,6). An estimated one-third of COPD patients are initially diagnosed in hospital following an exacerbation-related admission (7). Although current guidelines recommend against routine screening of asymptomatic adults (8), there is growing interest in the value of opportunistic case detection in primary care (9,10), with emerging evidence from clinical trials and modelling studies that case detection improves long-term patient outcomes and is likely to be cost-effective (11,12,13). A recent cost-effectiveness analysis by Johnson *et al.* (2021) evaluated primary care-based COPD case detection strategies in the general Canadian population. At a willingness-to-pay (WTP) threshold of \$50,000 per quality-adjusted life-year (QALY) gained, case detection with questionnaires or screening spirometry was cost-effective. The highest value strategy was regularly administering the COPD Diagnostic Questionnaire (CDQ) to all patients  $\geq 40$  years during routine primary care interactions (13).

However, given the high prevalence of undiagnosed COPD, investment in a national COPD case detection programme would require significant allocation of healthcare resources. In a time of intense pressure on healthcare budgets, we must consider the affordability of an intervention as well as its value. The aim of our study was to build on a previous cost-effectiveness analysis by evaluating the

1  
2  
3 budget impact of adopting primary care-based COPD case detection in the general Canadian population  
4 (13). We assessed total medical costs from the healthcare payer perspective of implementing eight case  
5 detection strategies that vary in their eligibility criteria and testing technology over a five-year time  
6 horizon between 2022 and 2026.  
7  
8  
9

## 10 **2. Methods**

11  
12 This study was designed in accordance with ISPOR best practice guidelines for budget impact analysis  
13 (15).  
14  
15

### 16 **2.1. Analytic framework**

17  
18 We used the Evaluation Platform in COPD (EPIC), a previously validated deterministic discrete-event  
19 microsimulation model of COPD in the general Canadian population aged  $\geq 40$  years. EPIC simulates the  
20 development and progression of COPD across the entire disease pathway, including demographics of  
21 the general Canadian population, smoking prevalence, COPD occurrence, symptoms, primary care visits,  
22 COPD diagnosis, lung function decline, exacerbations, COPD-related and background mortality, medical  
23 costs, and QALYs over a lifetime horizon (14). EPIC uses data from the Canadian Cohort of Obstructive  
24 Lung Disease (CanCOLD) study, a national prospective cohort of patients with COPD and at-risk of COPD,  
25 to model community diagnosis, primary care utilisation, and respiratory symptoms (16). Smoking status  
26 is based on Population Health Model, a validated microsimulation model developed by Statistics Canada  
27 (17). Each component of EPIC has passed rigorous tests of internal and external validity (14,13)  
28 (Appendix 1). This analysis simulated within EPIC the implementation of COPD case detection  
29 administered during routine primary care visits over a five-year time horizon (2022-2026).  
30  
31  
32  
33  
34  
35

### 36 **2.2. Target population**

37  
38 Our analysis was carried out in an open population, meaning individuals enter and exit the target  
39 population throughout the time horizon. We defined the target population as the entire general  
40 Canadian population aged  $\geq 40$  years, which was 19.8 million in 2022 based on Statistics Canada  
41 projections (18). The eligible population was the subset of the target population that was eligible for  
42 case detection, which varied by strategy. We report the budget impact for the target population for  
43 comparability between strategies with different eligibility criteria.  
44  
45

### 46 **2.3. Case detection**

47  
48 We evaluated eight case detection strategies used in the cost-effectiveness analysis by Johnson *et al.*  
49 (2021), all of which were found to be cost-effective at a WTP of \$50,000/QALY (Table 1). We did not  
50 consider repeat testing of the same individual at specified intervals due to the short time horizon and to  
51 show the costs of a single implementation of each strategy. Strategies are grouped according to their  
52 eligibility criteria for selecting patients to receive case detection, either all patients (S1), symptomatic  
53 patients (any one of cough, phlegm, wheeze, or dyspnea) (S2), or patients aged  $\geq 50$  years with a  
54  
55  
56  
57  
58  
59  
60

smoking history (S3). The testing technologies considered are the CDQ (19) and the hand-held flow meter (20), which performs screening spirometry based on the ratio of forced expiratory volume in 1 second to forced expiratory volume in 6 seconds  $<0.7$ . All scenarios were compared to a baseline scenario of no case detection.

Although we replicated all eight strategies reported by Johnson *et al.* (2021), our reporting focuses on S1a (CDQ  $\geq 17$  points for all patients), the highest value strategy identified at a WTP threshold of \$50,000/QALY gained. However, guidelines suggest that interventions with a large budgetary impact should be subject to lower cost-effectiveness thresholds (21). We recalibrated the cost-effectiveness plane in Johnson *et al.* (2021) (Appendix 3) and found that the WTP threshold must be reduced to \$25,000/QALY for S1a to no longer be the preferred strategy, at which point S3b (CDQ  $\geq 16.5$  points for patients  $\geq 50$  years with a smoking history) becomes most cost-effective. Therefore, for comparison, we also report results for S3b.

Table 1: Summary of case detection strategies evaluated.

| Testing technology                                                  | Eligibility criteria                          | Sensitivity (%) <sup>a</sup> | Specificity (%) <sup>a</sup> |
|---------------------------------------------------------------------|-----------------------------------------------|------------------------------|------------------------------|
| <b>(S1) All patients</b>                                            |                                               |                              |                              |
| <b>S1a:</b> CDQ $\geq 17$ points                                    | None                                          | 91.0                         | 49.0                         |
| <b>S1b:</b> Flow meter (with bronchodilator)                        |                                               | 80.0                         | 94.0                         |
| <b>S1c:</b> CDQ $\geq 17$ points + Flow meter (with bronchodilator) |                                               | 72.0                         | 97.0                         |
| <b>(S2) Symptomatic patients</b>                                    |                                               |                              |                              |
| <b>S2a:</b> Flow meter (without bronchodilator)                     | $\geq 1$ respiratory symptom <sup>b</sup>     | 81.5                         | 88.9                         |
| <b>(S3) Smoking history</b>                                         |                                               |                              |                              |
| <b>S3a:</b> CDQ $\geq 19.5$ points                                  | Past or current smoker<br>Age $\geq 50$ years | 64.5                         | 65.2                         |
| <b>S3b:</b> CDQ $\geq 16.5$ points                                  |                                               | 87.5                         | 38.8                         |
| <b>S3c:</b> Flow meter (without bronchodilator)                     |                                               | 79.9                         | 84.4                         |
| <b>S3d:</b> CDQ $\geq 17$ points + Flow meter (with bronchodilator) |                                               | 74.4                         | 97.0                         |

CDQ - COPD Diagnostic Questionnaire

<sup>a</sup> Sensitivity and specificity values are derived from the literature and further details have been provided previously (13).

<sup>b</sup> Respiratory symptoms defined as the presence of chronic cough in the absence of a cold, any wheeze, phlegm in the absence of a cold, or dyspnea, measured using the Medical Research Council dyspnea scale with a score of 2-5 indicating the presence of dyspnea, in the past year.

To be eligible for case detection an individual must fulfil the eligibility criteria and have visited primary care in the previous year (Figure 1). Patients testing positive at case detection were referred to outpatient diagnostic spirometry, which we assumed to have 100% accuracy. We modelled gradual market penetration of the case detection programme. We assumed a linear uptake from 5% in 2022 to 25% in 2026, based on participation in lung cancer and colon cancer screening programmes (22,23). Throughout the simulation, patients could also be diagnosed with COPD at primary care visits without the use of case detection or following an exacerbation-related admission to hospital.

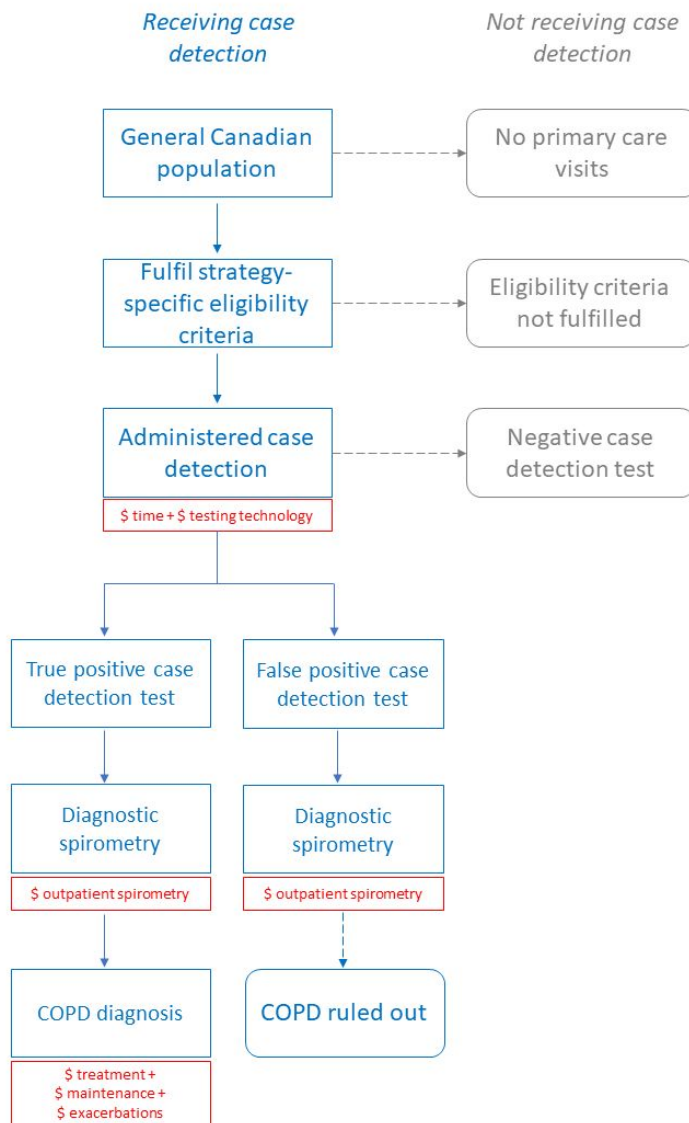

Figure 1: Schematic for administration of case detection programmes. Individuals receiving case detection are shown in blue, those not receiving case detection are shown in grey. Costs associated with case detection, diagnosis, and treatment that are included in the budget impact analysis are shown in red.

## 2.4. Inputs

We conducted the analysis from the Canadian healthcare system perspective, therefore only direct healthcare costs were included (Table 2). Costs were converted to 2021 Canadian dollars (\$) using the healthcare component of the Consumer Price Index (24) and were not discounted over the time horizon (15).

Administering case detection was costed at 34% of a 15-minute routine primary care visit (25,26). The CDQ is only assigned the time-related cost whereas flow meter strategies incur the additional cost of

1  
2  
3 screening spirometry. Outpatient diagnosis includes the cost of diagnostic spirometry plus a primary  
4 care visit to interpret the results. Unit costs of utilisation were determined from the British Columbia fee  
5 schedule (27).  
6

7  
8 Within EPIC, inhaled therapies are assigned to individuals according to the Global Initiative for COPD  
9 (GOLD) ABCD criteria following diagnosis or an exacerbation (3). Average annual costs of treatment with  
10 inhaled therapies were determined from medication dispensation records in British Columbia health  
11 administrative data (28). Three months of nicotine replacement therapy (NRT) was administered to all  
12 newly diagnosed patients who were current smokers. Adherence to both treatments was set at 70%.  
13 The associated effect of treatment on health outcomes is summarised in Table 2.  
14

15  
16 The medical costs of exacerbations and background medical costs (outside of exacerbations and  
17 treatment) were determined from published Canadian studies and applied by exacerbation severity and  
18 GOLD grade (29,30,31,32)  
19  
20

21  
22 *Table 2: Costs and parameter input values relevant to evaluation of case detection.*

| Item                                            | Value        | References |
|-------------------------------------------------|--------------|------------|
| <i>Global parameters</i>                        |              |            |
| Time horizon                                    | 5 years      |            |
| Population size                                 | 19.6 million | (18)       |
| Case detection initial uptake                   | 0.1          | (22)       |
| Annual increase in case detection uptake        | 0.1          |            |
| Discount for costs                              | 0            | (15)       |
| <i>Case detection costs</i>                     |              |            |
| Administration of CDQ                           | \$11.91      | (27)       |
| Flow meter with bronchodilator                  | \$30.81      |            |
| Flow meter without bronchodilator               | \$24.68      |            |
| Outpatient diagnosis                            | \$62.19      |            |
| <i>Treatment</i>                                |              |            |
| Costs (annual per-patient)                      |              |            |
| SABA                                            | \$55.17      | (28)       |
| LAMA                                            | \$366.55     |            |
| LAMA/LABA                                       | \$670.44     |            |
| ICS/LAMA/LABA                                   | \$1,185.23   |            |
| NRT                                             | \$382.63     | (36)       |
| Rate reduction for exacerbations                |              |            |
| SABA                                            | 0            | (33)       |
| LAMA                                            | 0.22         |            |
| LAMA/LABA                                       | 0.23         | (34)       |
| ICS/LAMA/LABA                                   | 0.34         | (35)       |
| NRT odds ratio for successful smoking cessation | 1.38         | (37,38)    |
| Medication adherence                            | 0.7          |            |

| <i>Exacerbation costs</i> <sup>a</sup>                     |             |         |
|------------------------------------------------------------|-------------|---------|
| Mild                                                       | \$31.68     | (29,30) |
| Moderate                                                   | \$793.08    |         |
| Severe                                                     | \$10,063.13 |         |
| Very severe                                                | \$22,033.60 |         |
| <i>Maintenance costs (annual per-patient)</i> <sup>b</sup> |             |         |
| GOLD 1                                                     | \$147.48    | (31,32) |
| GOLD 2                                                     | \$360.49    |         |
| GOLD 3                                                     | \$943.83    |         |
| GOLD 4                                                     | \$1,286.84  |         |

CDQ - COPD Diagnosis Questionnaire; NRT - Nicotine Replacement Therapy; SABA - Short-acting beta-agonists; LAMA - Long-acting muscarinic antagonist; LABA - Long-acting beta-agonist; ICS - Inhaled corticosteroids; GOLD - Global Initiative for COPD. General EPIC model parameters have been reported previously (14,13).

All costs are in 2021 Canadian dollars (\$).

<sup>a</sup> Mild exacerbations are defined as an intensification of symptoms that does not require an encounter with the health care system and so are only assigned the cost of increased medication, moderate exacerbations are those in which the patient visits a physician or emergency department but is not hospitalised, severe exacerbations are assumed to result in a hospital admission, and very severe exacerbations in admission to the intensive care unit.

<sup>b</sup> Maintenance costs include physician visits (generalist and specialists), rehabilitation programmes, laboratory tests and devices, and oxygen therapy. Treatment costs have been deducted from maintenance costs to avoid double counting (39).

## 2.5. Analysis

Budget impact was calculated for each strategy and year as the difference in total costs from the baseline scenario, where negative budget impact indicates additional healthcare resources are required (budget expansion). We also evaluated cost subcategories of case detection, treatment (inhaled therapies and NRT), and exacerbation-related hospitalisations. In addition, we evaluated the performance of each strategy by reporting the size of the eligible population, number of case detections administered, number of referrals to outpatient diagnostic spirometry, and number of additional true COPD diagnoses.

We conducted one-way sensitivity analysis to assess the impact of model assumptions. We evaluated low case detection uptake (2% to 10% range; 2%/year increase) and high uptake (8% to 40% range; 8%/year increase) scenarios. We ran separate analyses for reduced adherence to inhaled therapies of 0.5 and 0.3, following previous population assessments (40), and removing the administration of NRT following diagnosis since guidelines recommend smoking cessation for all current smokers irrespective of COPD diagnosis (3).

## 3. Results

The starting population size was 19.8 million. Over the time horizon, 2.3 million individuals entered the model and 940,000 left from death/emigration. At baseline the COPD prevalence among Canadians aged  $\geq 40$  years was 11.9% and 30.4% of individuals with COPD were diagnosed. These are similar to the COPD prevalence (11.2%) and proportion undiagnosed (29.7%) observed in the CanCOLD study (41,4) (Appendix 1).



The most inclusive strategies (S1 – all patients  $\geq 40$  years) resulted in 40.4% of the target population administered case detection after five years, compared to 16.7% under the least inclusive strategies (S3 – patients  $\geq 50$  years with a smoking history) (Table 3). In S1a (CDQ  $\geq 17$  points for all patients), an additional 146,412 individuals with COPD were diagnosed after five years compared to routine diagnosis in the no case detection scenario, which increased the proportion of COPD individuals diagnosed to 37.8% (from 30.4%) by 2026. The diagnosed proportion increased to 34.2% under S3b (CDQ  $\geq 16.5$  points for patients  $\geq 50$  with a smoking history). However, S1a also resulted in 4.6 million referrals to diagnostic spirometry, 96% of which were false positives.

Table 3: Five-year (2022-2026) cumulative results on scope and performance of case detection strategies.

|                                           | Eligible <sup>a</sup><br>(% of target population) | Administered case detection<br>(% of target population) | Referred for OP spirometry      |                                  | Additional diagnoses <sup>b</sup><br>(% target population) |
|-------------------------------------------|---------------------------------------------------|---------------------------------------------------------|---------------------------------|----------------------------------|------------------------------------------------------------|
|                                           |                                                   |                                                         | True positives<br>(% of tested) | False positives<br>(% of tested) |                                                            |
| <b>(S1) All patients</b>                  |                                                   |                                                         |                                 |                                  |                                                            |
| <b>S1a:</b> CDQ $\geq 17$                 | 20,467,519<br>(92.4%)                             | 8,942,130<br>(40.4%)                                    | 175,900<br>(2.0%)               | 4,465,334<br>(49.9%)             | 146,412<br>(0.66%)                                         |
| <b>S1b:</b> Flow meter                    |                                                   |                                                         | 85,554<br>(1.0%)                | 770,846<br>(8.6%)                | 68,485<br>(0.31%)                                          |
| <b>S1c:</b> CDQ $\geq 17$ +<br>Flow meter |                                                   |                                                         | 58,379<br>(0.7%)                | 412,323<br>(4.6%)                | 45,164<br>(0.20%)                                          |
| <b>(S2) Symptomatic patients</b>          |                                                   |                                                         |                                 |                                  |                                                            |
| <b>S2a:</b> Flow meter                    | 18,762,133<br>(84.7%)                             | 5,794,210<br>(26.2%)                                    | 86,587<br>(1.5%)                | 1,160,933<br>(20.0%)             | 69,591<br>(0.31%)                                          |
| <b>(S3) Smoking history</b>               |                                                   |                                                         |                                 |                                  |                                                            |
| <b>S3a:</b> CDQ $\geq 19.5$               | 8,492,353<br>(38.3%)                              | 3,707,894<br>(16.7%)                                    | 27,879<br>(0.8%)                | 1,383,738<br>(37.3%)             | 22,131<br>(0.10%)                                          |
| <b>S3b:</b> CDQ $\geq 16.5$               |                                                   |                                                         | 86,608<br>(2.3%)                | 2,118,887<br>(57.1%)             | 76,508<br>(0.35%)                                          |
| <b>S3c:</b> Flow meter                    |                                                   |                                                         | 55,313<br>(1.5%)                | 749,266<br>(20.2%)               | 47,441<br>(0.21%)                                          |
| <b>S3d:</b> CDQ $\geq 17$ +<br>Flow meter |                                                   |                                                         | 42,433<br>(1.1%)                | 184,331<br>(5.0%)                | 35,492<br>(0.16%)                                          |

OP – outpatient.

<sup>a</sup> Eligible defined as meeting the eligibility criteria and having visited primary care within the same year over the time horizon.

<sup>b</sup> Additional diagnoses compared to routine diagnosis under the baseline scenario of no case detection, after 5 years.

All strategies resulted in higher total costs compared to no case detection (Table 4). The greatest budget expansion was \$427 million for S1a, with 86% of costs attributed to administering case detection and subsequent diagnostic spirometry. The corresponding results for S3b were \$198 million and 84%. The costs of case detection began to plateau by the end of the time horizon as the proportion of eligible patients not already tested was depleted, whereas treatment costs continued to increase as more patients were diagnosed (Figure 2). Minor cost-savings were observed from exacerbation-related



admissions and outpatient care from fewer mild and moderate exacerbations, respectively saving \$5 million/year and \$10 million/year under S1a by 2026.

Table 4: Total budget impact (no case detection – case detection) results. Negative budget impact indicates budget expansion.

| Outcome                                              | S1a    | S1b    | S1c    | S2a    | S3a    | S3b    | S3c    | S3d    |
|------------------------------------------------------|--------|--------|--------|--------|--------|--------|--------|--------|
| <i>No case detection strategy costs (million \$)</i> |        |        |        |        |        |        |        |        |
| Case detection                                       | 0      |        |        |        |        |        |        |        |
| Treatment                                            | 2,306  |        |        |        |        |        |        |        |
| Hospitalisation                                      | 4,803  |        |        |        |        |        |        |        |
| Outpatient <sup>a</sup>                              | 6,826  |        |        |        |        |        |        |        |
| Total                                                | 13,935 |        |        |        |        |        |        |        |
| <i>Case detection strategy costs (million \$)</i>    |        |        |        |        |        |        |        |        |
| Case detection                                       | 402    | 338    | 423    | 226    | 135    | 185    | 145    | 178    |
| Treatment                                            | 2,371  | 2,331  | 2,318  | 2,334  | 2,311  | 2,342  | 2,326  | 2,319  |
| Hospitalisation                                      | 4,789  | 4,796  | 4,799  | 4,794  | 4,801  | 4,794  | 4,798  | 4,799  |
| Outpatient <sup>a</sup>                              | 6,800  | 6,809  | 6,813  | 6,808  | 6,822  | 6,814  | 6,817  | 6,819  |
| Total                                                | 14,362 | 14,274 | 14,449 | 14,161 | 14,068 | 14,133 | 14,086 | 14,115 |
| <i>Budget impact (million \$)</i>                    |        |        |        |        |        |        |        |        |
| Case detection                                       | -402   | -338   | -423   | -226   | -135   | -185   | -145   | -178   |
| Treatment                                            | -65    | -25    | -12    | -28    | -5     | -36    | -20    | -13    |
| Hospitalisation                                      | 14     | 7      | 4      | 9      | 3      | 10     | 6      | 4      |
| Outpatient <sup>a</sup>                              | 27     | 17     | 14     | 19     | 4      | 13     | 9      | 7      |
| Total                                                | -427   | -339   | -418   | -226   | -133   | -198   | -150   | -179   |

S1a CDQ  $\geq 17$  points for all patients; S1b flow meter (with bronchodilator) all patients; S1c CDQ  $\geq 17$  points + flow meter (with bronchodilator) all patients; S2a flow meter (without bronchodilator) among symptomatic patients; S3a CDQ  $\geq 19.5$  points among patients aged  $\geq 50$  years with a smoking history; S3b CDQ  $\geq 16.5$  points among patients aged  $\geq 50$  years with a smoking history; S3c flow meter (without bronchodilator) among patients aged  $\geq 50$  years with a smoking history, S3d CDQ  $\geq 17$  points + flow meter (with bronchodilator) among patients aged  $\geq 50$  years with a smoking history.

<sup>a</sup> Outpatient care are the remaining costs not included in case detection, treatment or hospitalisation and includes COPD maintenance costs, routine diagnosis, and costs associated with mild and moderate exacerbations which are assumed not to result in hospitalisation.

Sensitivity analyses showed minimal change in the ranking of strategies across analyses (Figure 2). Total budget impact decreased by a maximum of 4.5% when NRT was removed or medication adherence was decreased since case detection administration, which comprises the majority of costs, was unaffected. Results were most affected by uptake, with higher uptake rates (8% to 40% range; 8% /year) increase resulting in greater budget expansion (\$603 million under S1a) but also a greater proportion of COPD patients diagnosed (40.1% by 2026 under S1a) compared to the reference analysis.

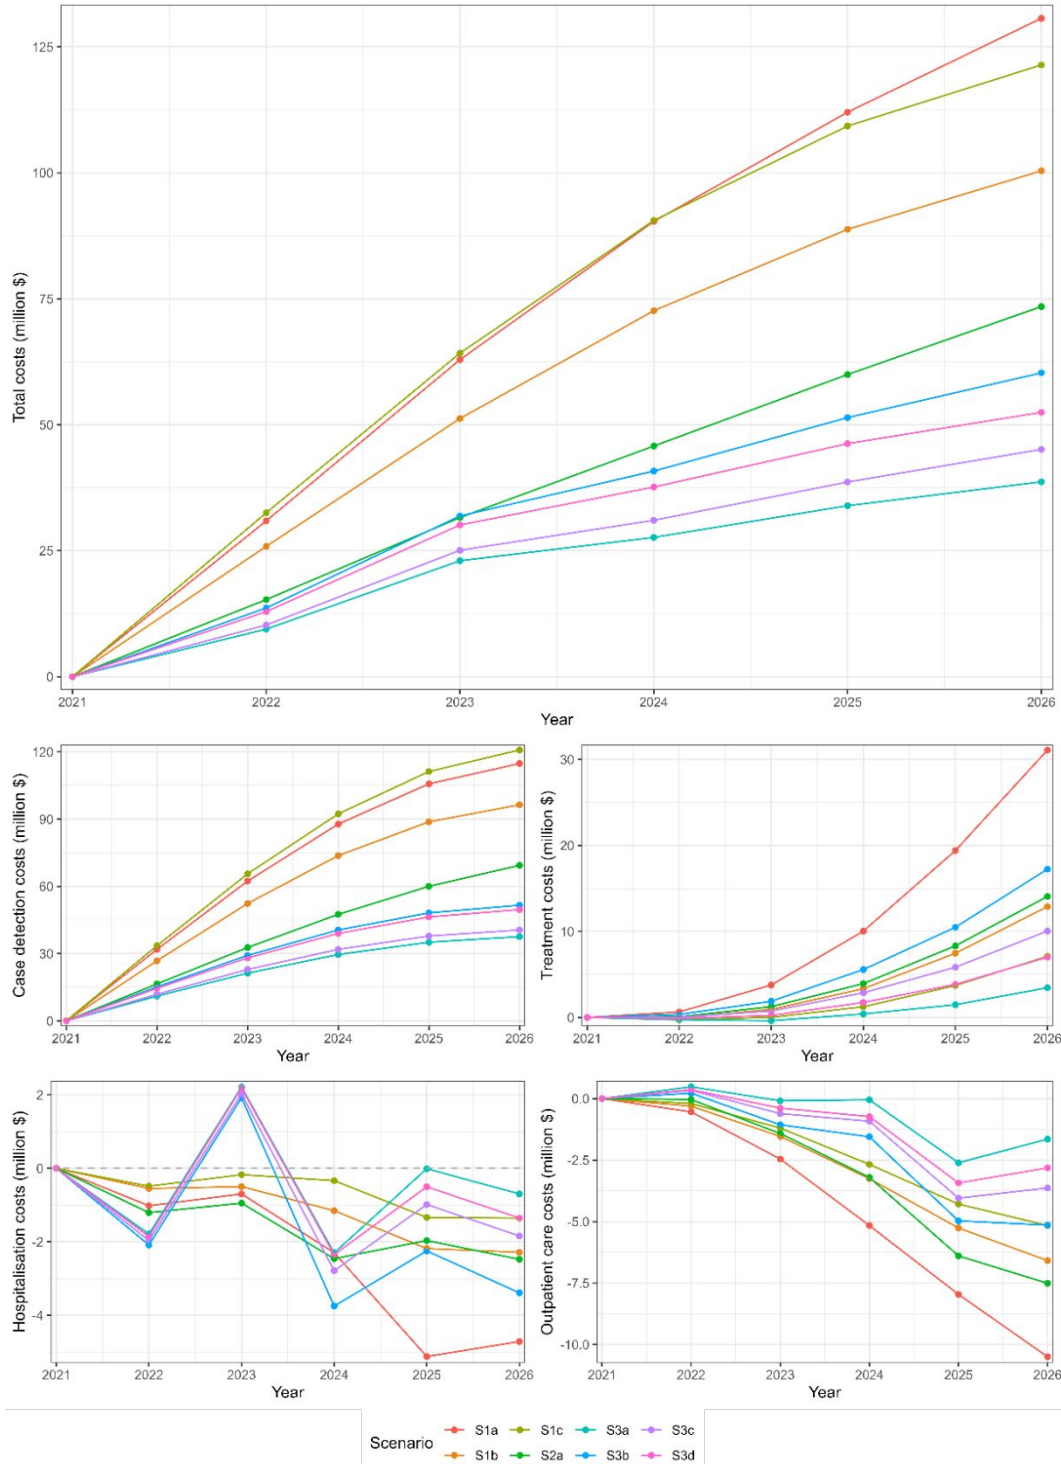

Figure 2: Annual total (top), case detection (middle left), treatment (middle right), hospitalisation (bottom left), and outpatient care (bottom right) additional costs (million \$) compared to no case detection baseline scenario. Negative additional costs indicate cost savings. S1a CDQ  $\geq 17$  points for all patients; S1b flow meter (with bronchodilator) all patients; S1c CDQ  $\geq 17$  points + flow meter (with bronchodilator) all patients; S2a flow meter (without bronchodilator) among symptomatic patients; S3a CDQ  $\geq 19.5$  points among patients aged  $\geq 50$  years with a smoking history; S3b CDQ  $\geq 16.5$  points among patients aged  $\geq 50$  years with a smoking history; S3c flow meter (without bronchodilator) among patients aged  $\geq 50$  years with a smoking history, S3d CDQ  $\geq 17$  points + flow meter (with bronchodilator) among patients aged  $\geq 50$  years with a smoking history. Corresponding results tables can be found in Appendix 2.

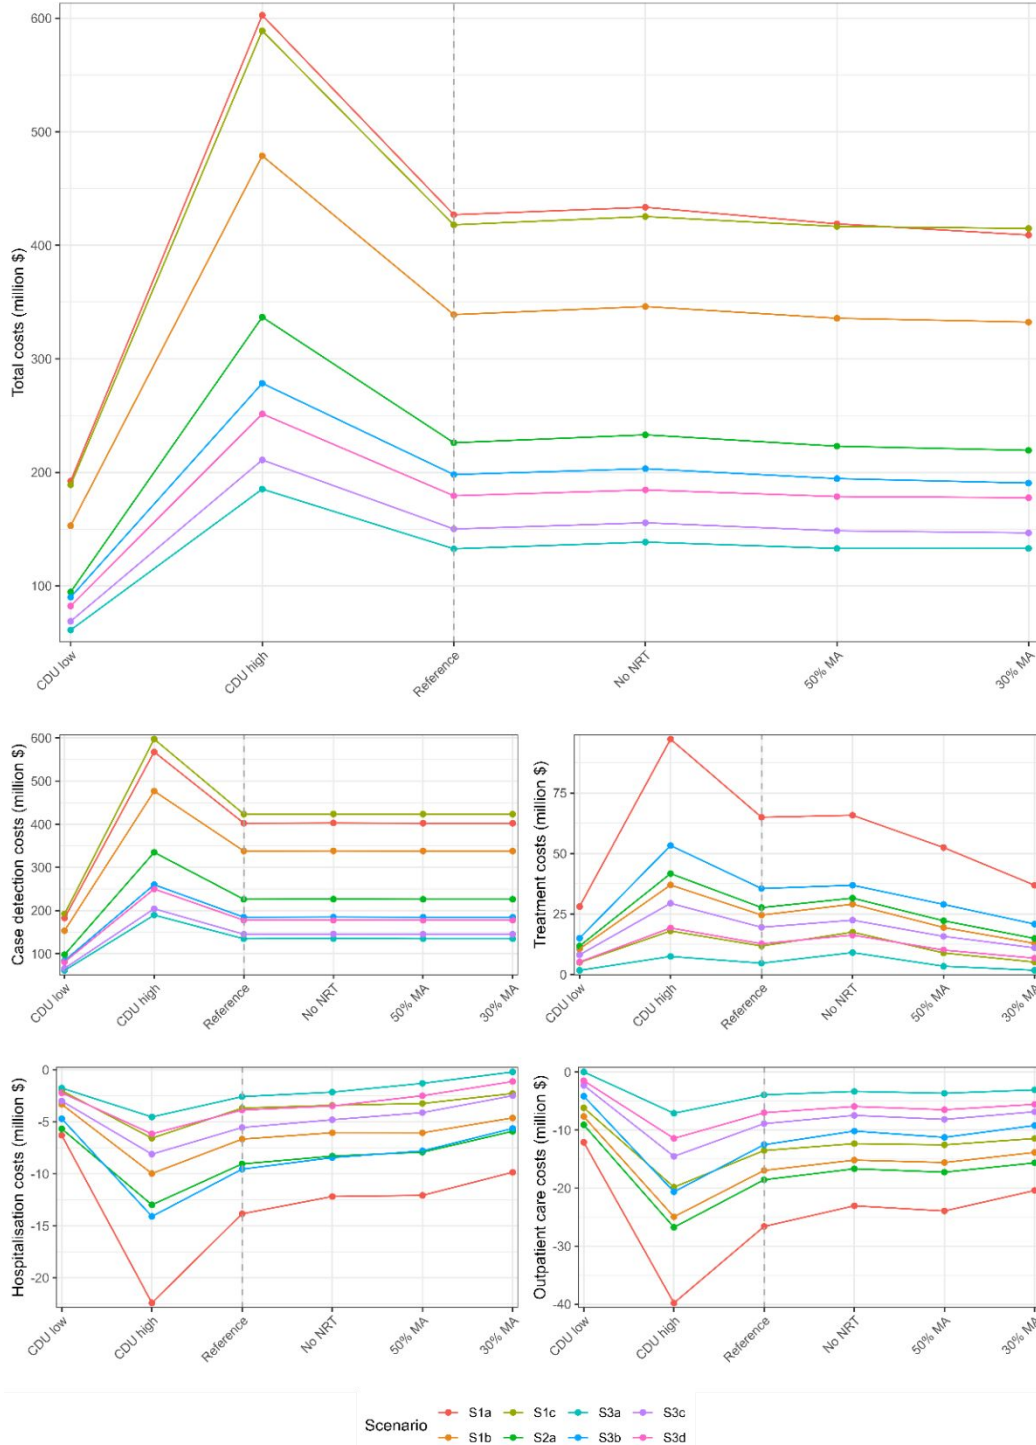

Figure 3: Sensitivity analysis of total additional costs of case detection strategies compared to no case detection. Negative additional costs indicate cost savings. Grey dashed line indicates the reference case analysis. CDU – case detection uptake (low uptake defined as 2% to 10% range with 2%/year increase and high uptake as 8% to 40% range with 8%/year increase); NRT – nicotine replacement therapy; MA – medication adherence. S1a CDQ  $\geq 17$  points for all patients; S1b flow meter (with bronchodilator) all patients; S1c CDQ  $\geq 17$  points + flow meter (with bronchodilator) all patients; S2a flow meter (without bronchodilator) among symptomatic patients; S3a CDQ  $\geq 19.5$  points among patients aged  $\geq 50$  years with a smoking history; S3b CDQ  $\geq 16.5$  points among patients aged  $\geq 50$  years with a smoking history; S3c flow meter (without bronchodilator) among patients aged  $\geq 50$  years with a smoking history, S3d CDQ  $\geq 17$  points + flow meter (with bronchodilator) among patients aged  $\geq 50$  years with a smoking history.

#### 4. Interpretation

We used a validated whole disease microsimulation model of COPD in the general Canadian population to evaluate the budget impact to the Canadian healthcare system of adopting primary care-based early detection strategies for COPD. Our results indicate that questionnaire-based case detection for all patients  $\geq 40$  years during routine primary care visits, although most effective at increasing the diagnosed prevalence, would have a large budgetary impact of \$427 million over five years. The majority of the budget expansion can be attributed to the cost of case detection itself while the contribution of treatment costs from identifying additional patients is relatively minor. Savings in hospitalisation costs from exacerbation reduction were minimal but would increase over a longer time horizon. The key feature in determining the affordability of case detection was the rate of uptake in primary care.

Total healthcare spending in Canada was estimated at \$331 billion in 2022, representing 12.2% of the country's GDP (42). Implementing a country-wide COPD case detection programme would require significant additional investment of healthcare resources, accounting for an estimated 0.04% of the healthcare budget by 2026 and an additional 4.6 million referrals for spirometry over five years. If the budget impact of a more inclusive strategy is deemed too high, then we must accept a lower cost-effectiveness threshold. At a reduced WTP, the CDQ at a low threshold remains the preferred testing technology but paired with stricter eligibility criteria (aged  $\geq 50$  years with a smoking history). The budget expansion would still be substantial (\$198 million and 2.2 million spirometry referrals over five years) but is less than half that of a more inclusive strategy. However, COPD has been declared a public health emergency, with rising prevalence and healthcare costs (43). It is also considered an ambulatory-sensitive condition, meaning that hospitalisations could be avoided through optimal outpatient management, which depends on a diagnosis (44). Strategies targeting a more limited population increase the proportion of diagnosed patients by 3.8%, compared to 10.1% for the most inclusive strategy with high uptake.

Our results highlight the need for increased diagnostic spirometry capacity, which may be the greatest barrier to implementing COPD case detection. A COPD diagnosis can only be confirmed using spirometry (45) yet there is massive underutilisation of this diagnostic test globally (46). In Canada, estimates for the proportion of patients with a community diagnosis of COPD who have never received spirometry range from 30% to 42% (46,47). A principal reason for this is a lack of equipment and trained personnel for spirometry in primary care where 80% of patients with COPD in Canada are managed (31). Primary care practitioners often refer patients to specialised pulmonary function laboratories, which can have long waiting lists and create further access barriers for rural and remote parts of Canada (49,50). Most strategies considered in this analysis would require at least one million diagnostic spirometry tests over five years, which we assume to be referred to outpatient services. Future research and discussions must consider solutions for upskilling primary care to perform diagnostic spirometry if COPD case finding strategies in the entire Canadian population are to be feasible.

This study has several limitations. First, our analysis based uptake on general population participation in lung cancer and colon cancer screening in Canada (22,23). Spirometry is a comparatively less invasive procedure so may have higher uptake, but given major issues with spirometry access, we do not exceed 40% per year as the upper limit in sensitivity analyses (47). Nonetheless, sensitivity analysis shows uptake to be a significant determinant in affordability and our analysis should be updated when results from empirical studies are available. Second, our model only accounts for the effect of inhaled therapies

on exacerbation rate and not the indirect improvement in lung function (51,52). We may observe more cost-saving if this latter mechanism was accounted for as patients would be less likely to progress to more severe disease stages. Third, we assume perfect recognition and reporting of symptoms. Many individuals at risk of COPD avoid activities that aggravate symptoms and fail to report symptoms during primary care visits (10). Therefore, we may have overestimated the number of individuals that would receive case detection under the symptomatic eligibility criteria. Finally, since EPIC is deterministic, we could not explore parameter uncertainty.

Adopting a national primary care-based case detection programme for COPD will require prioritisation by budget holders and significant additional investment to facilitate access to diagnostic spirometry. Case detection is an effective method for increasing the proportion of COPD patients diagnosed but depends on uptake of the programme in primary care.

## References

1. Evans J, Chen Y, Camp PG, Bowie DM, McRae L. Estimating the prevalence of COPD in Canada: Reported diagnosis versus measured airflow obstruction. *Health reports*. 2014 Mar; 25(3): 3-11.
2. Dicker D, Nguyen G, Abate D, Abate KH, Abay SM, Abbafati C, et al. Global, regional, and national age-sex-specific mortality and life expectancy, 1950–2017: a systematic analysis for the Global Burden of Disease Study 2017. *The Lancet*. 2018 Nov; 392(10159): 1684-1735.
3. Global Initiative for Chronic Obstructive Lung Disease (GOLD). *Global Strategy for the Diagnosis, Management, and Prevention of Chronic Obstructive Pulmonary Disease, 2020 Report*. ; 2020.
4. Labonté LE, Tan WC, Li PZ, Mancino P, Aaron SD, Benedetti A, et al. Undiagnosed Chronic Obstructive Pulmonary Disease Contributes to the Burden of Health Care Use. Data from the CanCOLD Study. *American Journal of Respiratory and Critical Care Medicine*. 2016 Aug; 194(3): 285-298.
5. Yawn BP, Martinez FJ. POINT: Can Screening for COPD Improve Outcomes? Yes. *Chest*. 2020 Jan; 157(1): 7-9.
6. Larsson K, Janson C, Ställberg B, Lisspers K, Olsson P, Kostikas K, et al. Impact of COPD diagnosis timing on clinical and economic outcomes: the ARCTIC observational cohort study. *International Journal of Chronic Obstructive Pulmonary Disease*. 2019 May; Volume 14: 995-1008.
7. Balcells E, Gimeno-Santos E, de Batlle J, Ramon MA, Rodríguez E, Benet M, et al. Characterisation and prognosis of undiagnosed chronic obstructive pulmonary disease patients at their first hospitalisation. *BMC Pulmonary Medicine*. 2015 Dec; 15(1): 4.
8. US Preventive Services Task Force (USPSTF). Screening for Chronic Obstructive Pulmonary Disease: US Preventive Services Task Force Recommendation Statement. *JAMA*. 2016 Apr; 315(13): 1372.



- 1
- 2
- 3
- 4 9. Bhatt SP, O'Connor GT. Screening for Chronic Obstructive Pulmonary Disease: Challenges and
- 5 Opportunities. *JAMA*. 2022 May; 327(18): 1768-1770.
- 6
- 7 10. Laucho-Contreras ME, Cohen-Todd M. Early diagnosis of COPD: myth or a true perspective.
- 8 *European Respiratory Review*. 2020 Dec; 29(158): 200131.
- 9
- 10 11. Lambe T, Adab P, Jordan RE, Sitch A, Enocson A, Jolly K, et al. Model-based evaluation of the long-
- 11 term cost-effectiveness of systematic case-finding for COPD in primary care. *Thorax*. 2019 Aug;
- 12 74(8): 730-739.
- 13
- 14 12. Jordan RE, Adab P, Sitch A, Enocson A, Blissett D, Jowett S, et al. Targeted case finding for chronic
- 15 obstructive pulmonary disease versus routine practice in primary care (TargetCOPD): a cluster-
- 16 randomised controlled trial. *The Lancet Respiratory Medicine*. 2016 Sep; 4(9): 720-730.
- 17
- 18 13. Johnson KM, Sadatsafavi M, Adibi A, Lynd L, Harrison M, Tavakoli H, et al. Cost Effectiveness of Case
- 19 Detection Strategies for the Early Detection of COPD. *Applied Health Economics and Health Policy*.
- 20 2021 Mar; 19(2): 203-215.
- 21
- 22 14. Sadatsafavi M, Ghanbarian S, Adibi A, Johnson K, FitzGerald JM, Flanagan W, et al. Development and
- 23 Validation of the Evaluation Platform in COPD (EPIC): A Population-Based Outcomes Model of COPD
- 24 for Canada. *Medical Decision Making*. 2019 Feb; 39(2): 152-167.
- 25
- 26 15. Sullivan SD, Mauskopf JA, Augustovski F, Jaime Caro J, Lee KM, Minchin M, et al. Budget Impact
- 27 Analysis—Principles of Good Practice: Report of the ISPOR 2012 Budget Impact Analysis Good
- 28 Practice II Task Force. *Value in Health*. 2014 Jan; 17(1): 5-14.
- 29
- 30 16. Bourbeau J, Tan WC, Benedetti A, Aaron SD, Chapman KR, Coxson HO, et al. Canadian Cohort
- 31 Obstructive Lung Disease (CanCOLD): Fulfilling the Need for Longitudinal Observational Studies in
- 32 COPD. *COPD: Journal of Chronic Obstructive Pulmonary Disease*. 2014 Apr; 11(2): 125-132.
- 33
- 34 17. Hennessy DA, Flanagan WM, Tanuseputro P, Bennett C, Tuna M, Kopec J, et al. The Population
- 35 Health Model (POHEM): an overview of rationale, methods and applications. *Population Health*
- 36 *Metrics*. 2015 Dec; 13(1): 24.
- 37
- 38 18. Statistics Canada. Table 17-10-0005-01 Population estimates on July 1st, by age and sex. [Online].
- 39 [cited 2022 November 24. Available from: <https://www150.statcan.gc.ca>.
- 40
- 41 19. Price DB, Tinkelman DG, Halbert RJ, Nordyke RJ, Isonaka S, Nonikov D, et al. Symptom-Based
- 42 Questionnaire for Identifying COPD in Smokers. *Respiration*. 2006; 73(3): 285-295.
- 43
- 44 20. Haroon S, Jordan R, Takwoingi Y, Adab P. Diagnostic accuracy of screening tests for COPD: a
- 45 systematic review and meta-analysis. *BMJ Open*. 2015 Oct; 5(10): e008133.
- 46
- 47 21. McCabe C, Claxton K, Culyer AJ. The NICE Cost-Effectiveness Threshold What it is and What that
- 48 Means. *Pharmacoeconomics*. 2008; 26(9): 733-744.
- 49
- 50 22. Goffin JR, Flanagan WM, Miller AB, Fitzgerald NR, Memon S, Wolfson MC, et al. Cost-effectiveness of
- 51 Lung Cancer Screening in Canada. *JAMA Oncology*. 2015 Sep; 1(6): 807.
- 52
- 53
- 54
- 55
- 56
- 57
- 58
- 59
- 60

- 1  
2  
3  
4  
5  
6  
7  
8  
9  
10  
11  
12  
13  
14  
15  
16  
17  
18  
19  
20  
21  
22  
23  
24  
25  
26  
27  
28  
29  
30  
31  
32  
33  
34  
35  
36  
37  
38  
39  
40  
41  
42  
43  
44  
45  
46  
47  
48  
49  
50  
51  
52  
53  
54  
55  
56  
57  
58  
59  
60
23. Cancer Care Ontario. ColonCancerCheck 2010 Program Report. [Online].; 2012 [cited 2022 November 25. Available from: <https://www.cancercareontario.ca/sites/ccocancercare/files/assets/OCSPAnnualReport2010.pdf?direct=true>.
  24. Statistics Canada. Table 18-10-0004-08 Consumer Price Index, monthly, percentage change, not seasonally adjusted, Canada, provinces, Whitehorse and Yellowknife — Health and personal care. [Online]. [cited 2022 November 24. Available from: <https://www150.statcan.gc.ca>.
  25. Tai-Seale M, McGuire TG, Zhang W. Time Allocation in Primary Care Office Visits. *Health Services Research*. 2007 Jan; 42(5): 1871-1894.
  26. Irving G, Neves AL, Dambha-Miller H, Oishi A, Tagashira H, Verho A, et al. International variations in primary care physician consultation time: a systematic review of 67 countries. *BMJ Open*. 2017 Oct; 7(10): e017902.
  27. British Columbia Ministry of Health. Medical Services Commission Payment Schedule. [Online].; 2019 [cited 2022 November 25. Available from: <https://www2.gov.bc.ca/gov/content/health/practitioner-professional-resources/msp/physicians/payment-schedules/msc-payment-schedule>.
  28. Tavakoli H, Johnson KM, FitzGerald JM, Sin DD, Gershon A, Kendzerska T, et al. Trends in prescriptions and costs of inhaled medications in chronic obstructive pulmonary disease: a 19-year population-based study from Canada. *International Journal of Chronic Obstructive Pulmonary Disease*. 2019 Sep; Volume 14: 2003-2013.
  29. Mittmann N, Kuramoto L, Seung SJ, Haddon JM, Bradley-Kennedy C, FitzGerald JM. The cost of moderate and severe COPD exacerbations to the Canadian healthcare system. *Respiratory Medicine*. 2008 Mar; 102(3): 413-421.
  30. Canadian Institute of Health Information (CIHI). Care in Canadian ICUs. [Online].; 2016 [cited 2022 November 25. Available from: [https://secure.cihi.ca/free\\_products/ICU\\_Report\\_EN.pdf](https://secure.cihi.ca/free_products/ICU_Report_EN.pdf).
  31. Chapman KR, Bourbeau J, Rance L. The burden of COPD in Canada: results from the confronting COPD survey. *Respiratory Medicine*. 2003 Mar; 97: S23-S31.
  32. Spencer M, Briggs AH, Grossman RF, Rance L. Development of an Economic Model to Assess the Cost Effectiveness of Treatment Interventions for Chronic Obstructive Pulmonary Disease. *Pharmacoeconomics*. 2005; 23(6): 619-637.
  33. Zhou Y, Zhong Ns, Li X, Chen S, Zheng J, Zhao D, et al. Tiotropium in Early-Stage Chronic Obstructive Pulmonary Disease. *New England Journal of Medicine*. 2017 Sep; 377(10): 923-935.
  34. Calverley PMA, Anderson JA, Celli B, Ferguson GT, Jenkins C, Jones PW, et al. Salmeterol and Fluticasone Propionate and Survival in Chronic Obstructive Pulmonary Disease. *New England Journal of Medicine*. 2007 Feb; 356(8): 775-789.



- 1  
2  
3  
4  
5  
6  
7  
8  
9  
10  
11  
12  
13  
14  
15  
16  
17  
18  
19  
20  
21  
22  
23  
24  
25  
26  
27  
28  
29  
30  
31  
32  
33  
34  
35  
36  
37  
38  
39  
40  
41  
42  
43  
44  
45  
46  
47  
48  
49  
50  
51  
52  
53  
54  
55  
56  
57  
58  
59  
60
35. Ferguson GT, Rabe KF, Martinez FJ, Fabbri LM, Wang C, Ichinose M, et al. Triple therapy with budesonide/glycopyrrolate/formoterol fumarate with co-suspension delivery technology versus dual therapies in chronic obstructive pulmonary disease (KRONOS): a double-blind, parallel-group, multicentre, phase 3 randomised controlled tr. *The Lancet Respiratory Medicine*. 2018; 6(10): 747-758.
  36. Mullen KA, Coyle D, Manuel D, Nguyen HV, Pham B, Pipe AL, et al. Economic evaluation of a hospital-initiated intervention for smokers with chronic disease, in Ontario, Canada. *Tobacco Control*. 2015 Sep; 24(5): 489.
  37. Wu P, Wilson K, Dimoulas P, Mills EJ. Effectiveness of smoking cessation therapies: a systematic review and meta-analysis. *BMC Public Health*. 2006 Dec; 6(1): 300.
  38. Murray RP, Connett JE, Rand CS, Pan W, Anthonisen NR. Persistence of the Effect of the Lung Health Study (LHS) Smoking Intervention over Eleven Years. *Preventive Medicine*. 2002 Oct; 35(4): 314-319.
  39. Stafyla E, Geitona M, Kerenidi T, Economou A, Daniil Z, Gourgoulianis K. The annual direct costs of stable COPD in Greece. *International Journal of Chronic Obstructive Pulmonary Disease*. 2018 Jan; Volume 13: 309-315.
  40. Montes de Oca M, Menezes A, Wehrmeister FC, Lopez Varela MV, Casas A, Ugalde L, et al. Adherence to inhaled therapies of COPD patients from seven Latin American countries: The LASSYC study. *PLOS ONE*. 2017 Nov; 12(11): e0186777.
  41. Leung C, Bourbeau J, Sin DD, Aaron SD, FitzGerald JM, Maltais F, et al. The Prevalence of Chronic Obstructive Pulmonary Disease (COPD) and the Heterogeneity of Risk Factors in the Canadian Population: Results from the Canadian Obstructive Lung Disease (COLD) Study. *International Journal of Chronic Obstructive Pulmonary Disease*. 2021 Feb; Volume 16: 305-320.
  42. Canadian Institute for Health Information. National health expenditure trends [product release]. [Online].; 2022 [cited 2022 November 25. Available from: <https://www.cihi.ca/en/national-health-expenditure-trends>.
  43. Khakban A, Sin DD, FitzGerald JM, McManus BM, Ng R, Hollander Z, et al. The Projected Epidemic of Chronic Obstructive Pulmonary Disease Hospitalizations over the Next 15 Years. A Population-based Perspective. *American Journal of Respiratory and Critical Care Medicine*. 2017 Feb; 195(3): 287-291.
  44. Hodgson K, Deeny SR, Steventon A. Ambulatory care-sensitive conditions: their potential uses and limitations. *BMJ Quality & Safety*. 2019 Jun; 28(6): 429-433.
  45. Bourbeau J, Bhutani M, Hernandez P, Aaron SD, Balter M, Beauchesne MF, et al. Canadian Thoracic Society Clinical Practice Guideline on pharmacotherapy in patients with COPD – 2019 update of evidence. *Canadian Journal of Respiratory, Critical Care, and Sleep Medicine*. 2019 Oct; 3(4): 210-232.
  46. Lamprecht B, Soriano JB, Studnicka M, Kaiser B, Vanfleteren LE, Gnatiuc L, et al. Determinants of Underdiagnosis of COPD in National and International Surveys. *Chest*. 2015 Oct; 148(4): 971-985.

- 1  
2  
3 47. Gershon A, Mecredy G, Croxford R, To T, Stanbrook MB, Aaron SD. Outcomes of patients with  
4 chronic obstructive pulmonary disease diagnosed with or without pulmonary function testing.  
5 Canadian Medical Association Journal. 2017 Apr; 189(14): E530-E538.  
6
- 7 48. Gershon AS, Hwee J, Chapman KR, Aaron SD, O'Donnell DE, Stanbrook M, et al. Factors associated  
8 with undiagnosed and overdiagnosed COPD. European Respiratory Journal. 2016 Aug; 48(2): 561-  
9 564.  
10
- 11 49. Camp PG, Levy RD. A snapshot of chronic obstructive pulmonary disease in British Columbia and  
12 Canada. BCMJ. 2008 Mar; 50(2): 80.  
13
- 14 50. Gupta S. Diagnosing asthma and chronic obstructive pulmonary disease. Canadian Family Physician.  
15 2022 Jun; 68(6): 441-444.  
16
- 17 51. Dransfield MT, Kunisaki KM, Strand MJ, Anzueto A, Bhatt SP, Bowler RP, et al. Acute Exacerbations  
18 and Lung Function Loss in Smokers with and without Chronic Obstructive Pulmonary Disease.  
19 American Journal of Respiratory and Critical Care Medicine. 2017 Feb; 195(3): 324-330.  
20
- 21 52. Barrecheguren M, González C, Miravittles M. What have we learned from observational studies and  
22 clinical trials of mild to moderate COPD? Respiratory Research. 2018 Dec; 19(1): 177.  
23
- 24 53. Duarte-de-Araújo A, Teixeira P, Hespanhol V, Correia-de-Sousa J. COPD: understanding patients'  
25 adherence to inhaled medications. International Journal of Chronic Obstructive Pulmonary Disease.  
26 2018 Sep; Volume 13: 2767-2773.  
27
- 28 54. Soriano JB, Abajobir AA, Abate KH, Abera SF, Agrawal A, Ahmed MB, et al. Global, regional, and  
29 national deaths, prevalence, disability-adjusted life years, and years lived with disability for chronic  
30 obstructive pulmonary disease and asthma, 1990–2015: a systematic analysis for the Global Burden  
31 of Disease Study 2015. The Lancet Respiratory Medicine. 2017 Sep; 5(9): 691-706.  
32
- 33 55. Duarte-de-Araújo A, Fonte P, Teixeira P, Hespanhol V, Correia-de-Sousa J. Is an Early Diagnosis of  
34 COPD Clinically Useful? Archivos de Bronconeumología. 2020; 56(6): 409-410.  
35
- 36 56. Çolak Y, Afzal S, Nordestgaard BG, Vestbo J, Lange P. Prognosis of asymptomatic and symptomatic,  
37 undiagnosed COPD in the general population in Denmark: a prospective cohort study. The Lancet  
38 Respiratory Medicine. 2017 May; 5(5): 426-434.  
39
- 40 57. Northern Health Physicians. Update on Pulmonary Function and Spirometry Testing in the North.  
41 2021 Mar.  
42  
43  
44  
45  
46  
47  
48  
49  
50  
51  
52  
53  
54  
55  
56  
57  
58  
59  
60

1  
2  
3  
4  
5  
6  
7  
8  
9  
10  
11  
12  
13  
14  
15  
16  
17  
18  
19  
20  
21  
22  
23  
24  
25  
26  
27  
28  
29  
30  
31  
32  
33  
34  
35  
36  
37  
38  
39  
40  
41  
42  
43  
44  
45  
46  
47  
48  
49  
50  
51  
52  
53  
54  
55  
56  
57  
58  
59  
60

Supplementary Material

# Budget impact analysis of adopting primary care-based COPD case detection in the Canadian general population

## Contents

|                                                                 |    |
|-----------------------------------------------------------------|----|
| <b>Appendix 1: EPIC validation</b> .....                        | 2  |
| <b>Appendix 2: Budget impact results tables</b> .....           | 5  |
| <b>Appendix 3: Recalibrating cost-effectiveness plane</b> ..... | 9  |
| References.....                                                 | 10 |

Confidential

## Appendix 1: EPIC validation

The Evaluation Platform in COPD (EPIC) is a previously developed model and has undergone rigorous validation including replicating the rate and severity of exacerbations and COPD-related mortality rate in two external cohort studies. Details have been previously described elsewhere (1,2). Below we summarise the key elements relevant to the budget impact analysis.

Population size and demographics are based on population projections from Statistics Canada (3). Figures 1 shows results of the validation of population size and Figure 2 shows the population pyramid for 2025, near the end of the study time horizon.

Confidential

1  
2  
3 The diagnosis module has been calibrated to yield a stable proportion of diagnosed patients among  
4 COPD individuals approximately equal to that observed in Canadian Cohort of Obstructive Lung Disease  
5 (CanCOLD) (29.7%) (4,5). Further, overdiagnosis is calibrated to yield a stable proportion of false positive  
6 diagnoses among non-COPD individuals at 3% in accordance with the observed input CanCOLD data  
7 source (2) and similar to previous studies (6). Figures 3 and 4 shows results of the validation over a 20-  
8 year time horizon for 150,000 individuals simulated in EPIC.  
9  
10  
11

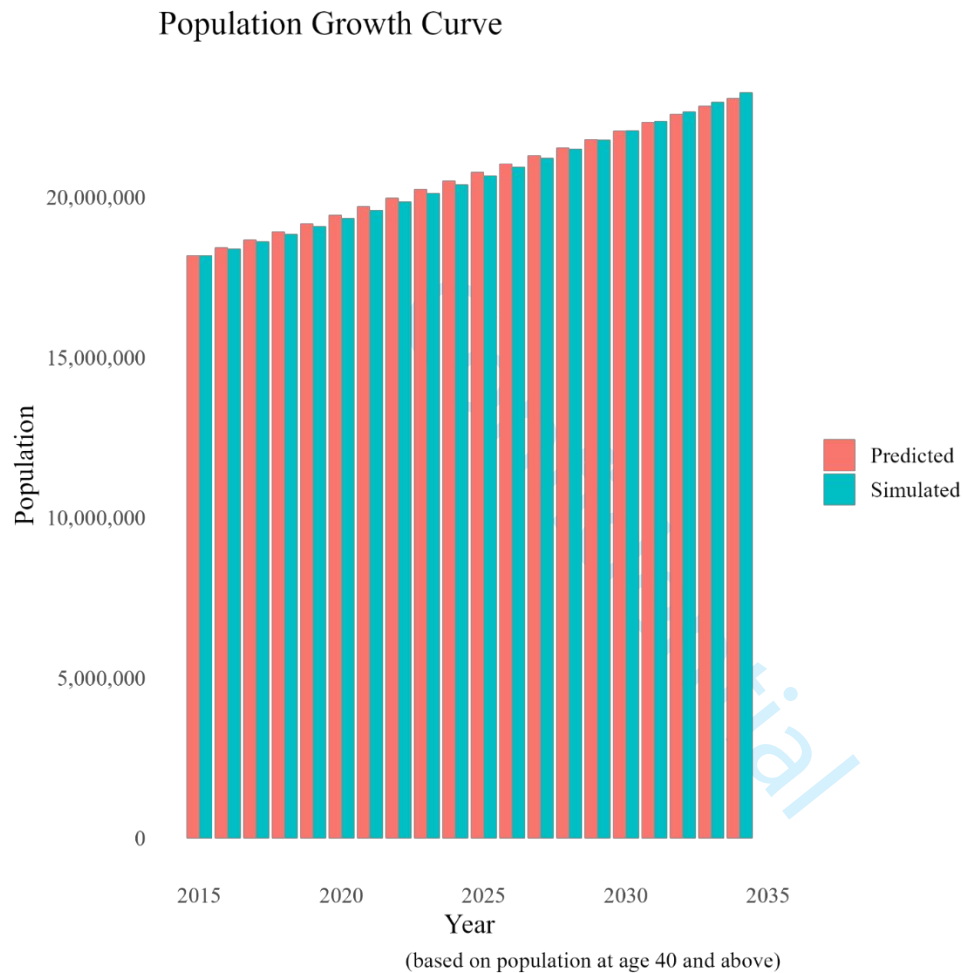

Figure 1: EPIC-simulated population growth compared with population projections between 2015-2035.

### Simulated vs. Predicted Population Pyramid in 2025

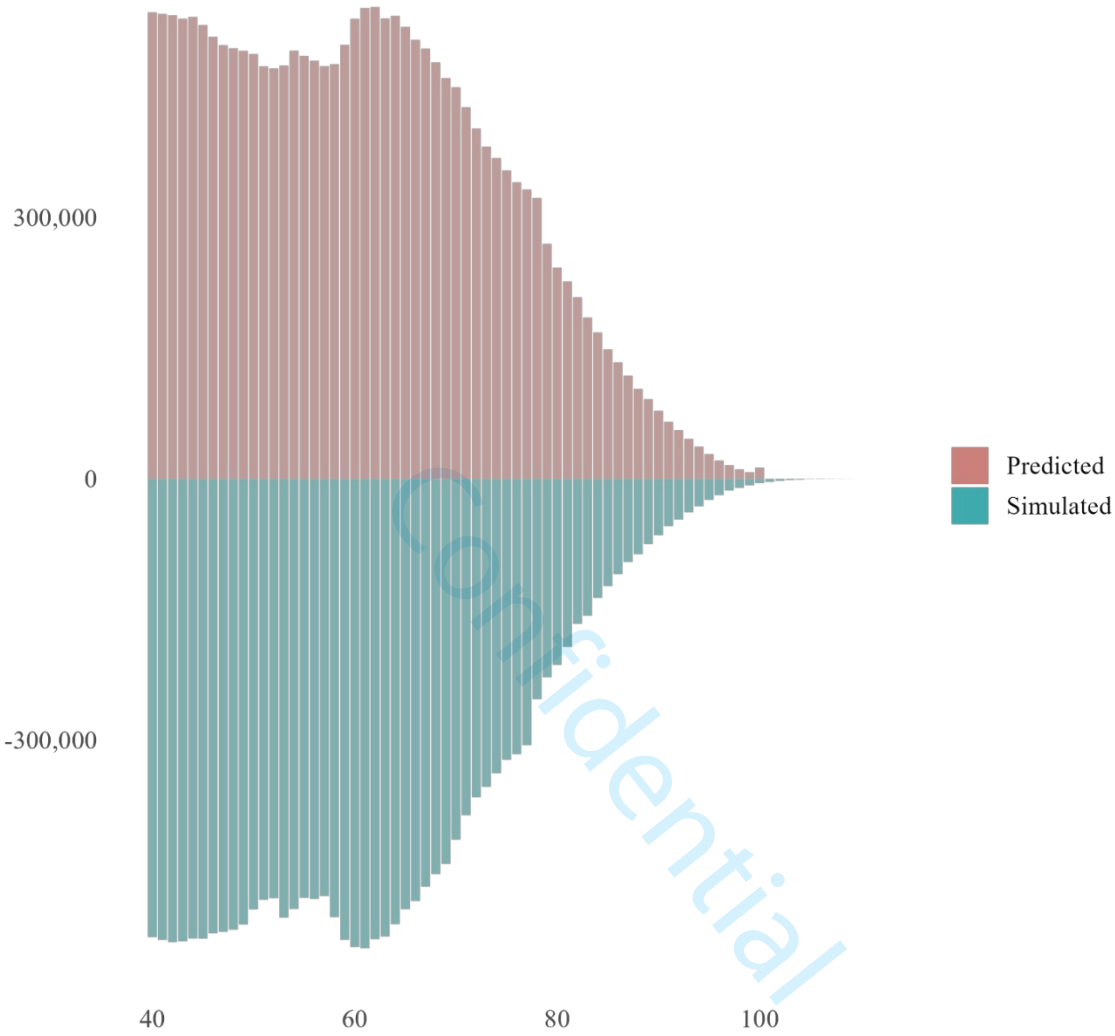

Figure 2: Comparison of EPIC-simulated and predicted population pyramid in 2025.

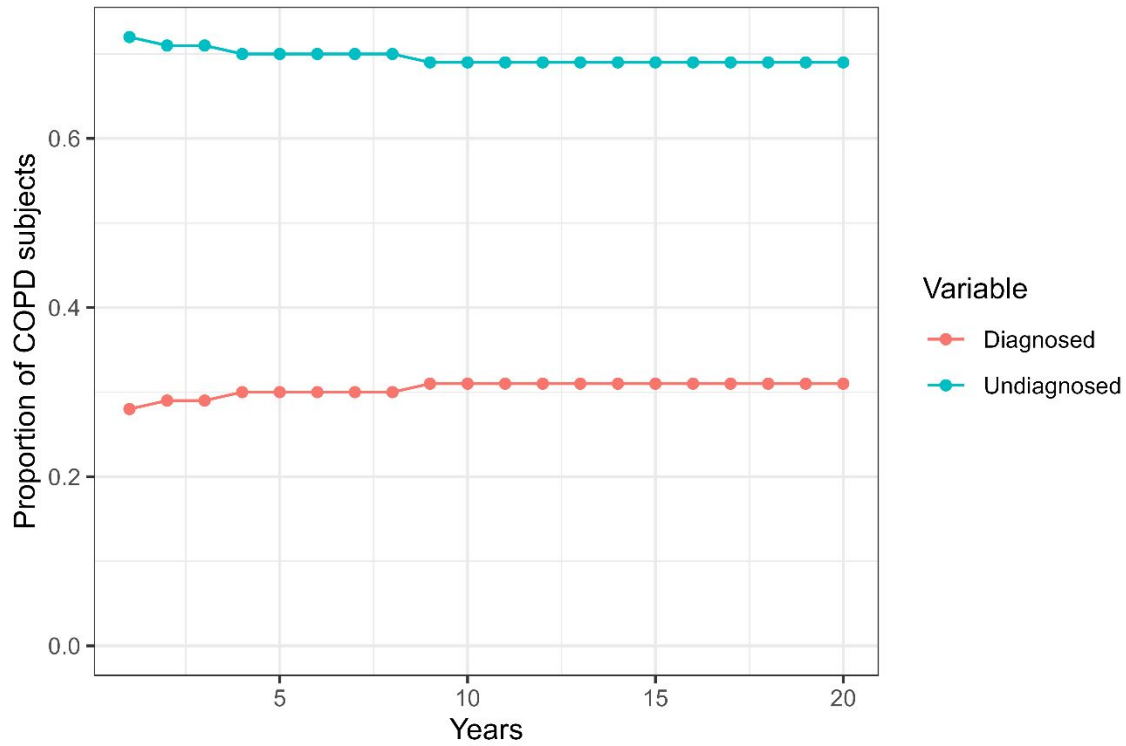

Figure 3: Proportion of COPD individuals diagnosed over a 20-year time horizon.

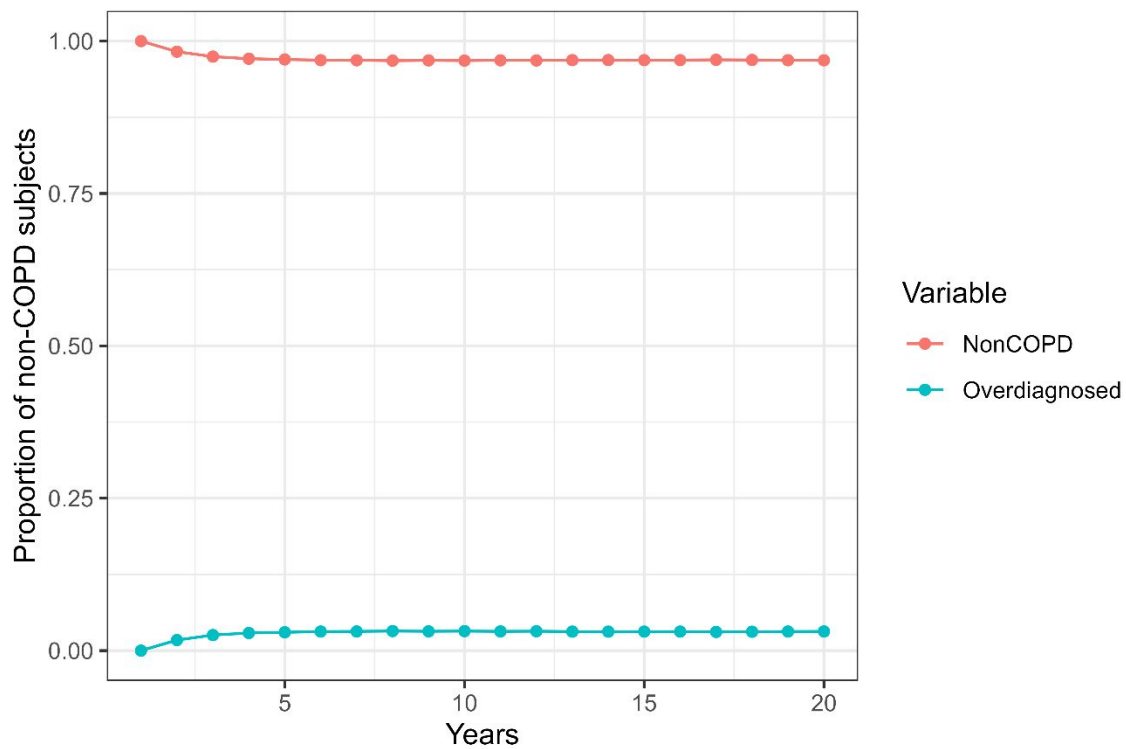

Figure 4: Proportion of non-COPD individuals overdiagnosed over a 20-year time horizon.



## Appendix 2: Budget impact results tables

Tables 1-8 show the extended annual budget impact results for each strategy compared to a baseline scenario of no case detection.

Table 1: Annual budget impact results for case detection strategy S1a.

| Outcome                                 | 2021<br>(Baseline) | 2022          | 2023          | 2024          | 2025          | 2026          |
|-----------------------------------------|--------------------|---------------|---------------|---------------|---------------|---------------|
| <i>No case detection strategy costs</i> |                    |               |               |               |               |               |
| Case detection                          | 0                  | 0             | 0             | 0             | 0             | 0             |
| Treatment                               | 394,085,160        | 417,656,325   | 440,034,691   | 461,746,194   | 482,599,088   | 504,002,620   |
| Hospitalisation                         | 865,204,886        | 888,793,402   | 918,354,884   | 960,395,553   | 994,814,145   | 1,040,766,389 |
| Outpatient                              | 1,228,997,220      | 1,270,865,091 | 1,315,981,550 | 1,360,852,191 | 1,413,585,302 | 1,464,921,348 |
| Total                                   | 2,488,287,266      | 2,577,314,818 | 2,674,371,125 | 2,782,993,938 | 2,890,998,535 | 3,009,690,357 |
| <i>Case detection strategy costs</i>    |                    |               |               |               |               |               |
| Case detection                          | 0                  | 31,843,232    | 62,308,330    | 87,774,451    | 105,707,025   | 114,791,770   |
| Treatment                               | 394,085,160        | 418,294,420   | 443,806,303   | 471,779,227   | 502,008,400   | 535,093,501   |
| Hospitalisation                         | 865,204,886        | 887,775,922   | 917,658,968   | 958,099,983   | 989,693,750   | 1,036,054,776 |
| Outpatient                              | 1,228,997,220      | 1,270,323,883 | 1,313,524,083 | 1,355,690,755 | 1,405,624,803 | 1,454,425,244 |
| Total                                   | 2,488,287,266      | 2,608,237,457 | 2,737,297,683 | 2,873,344,416 | 3,003,033,978 | 3,140,365,291 |
| <i>Budget impact</i>                    |                    |               |               |               |               |               |
| Case detection                          | 0                  | -31,843,232   | -62,308,330   | -87,774,451   | -105,707,025  | -114,791,770  |
| Treatment                               | 0                  | -638,095      | -3,771,612    | -10,033,033   | -19,409,311   | -31,090,881   |
| Hospitalisation                         | 0                  | 1,017,479     | 695,917       | 2,295,570     | 5,120,394     | 4,711,613     |
| Outpatient                              | 0                  | 541,208       | 2,457,467     | 5,161,436     | 7,960,499     | 10,496,104    |
| Total                                   | 0                  | -30,922,639   | -62,926,558   | -90,350,478   | -112,035,443  | -130,674,934  |

Table 2: Annual budget impact results for case detection strategy S1b.

| Outcome                                 | 2021<br>(Baseline) | 2022          | 2023          | 2024          | 2025          | 2026          |
|-----------------------------------------|--------------------|---------------|---------------|---------------|---------------|---------------|
| <i>No case detection strategy costs</i> |                    |               |               |               |               |               |
| Case detection                          | 0                  | 0             | 0             | 0             | 0             | 0             |
| Treatment                               | 394,085,160        | 417,656,325   | 440,034,691   | 461,746,194   | 482,599,088   | 504,002,620   |
| Hospitalisation                         | 865,204,886        | 888,793,402   | 918,354,884   | 960,395,553   | 994,814,145   | 1,040,766,389 |
| Outpatient                              | 1,228,997,220      | 1,270,865,091 | 1,315,981,550 | 1,360,852,191 | 1,413,585,302 | 1,464,921,348 |
| Total                                   | 2,488,287,266      | 2,577,314,818 | 2,674,371,125 | 2,782,993,938 | 2,890,998,535 | 3,009,690,357 |
| <i>Case detection strategy costs</i>    |                    |               |               |               |               |               |
| Case detection                          | 0                  | 26,771,844    | 52,338,339    | 73,700,833    | 88,762,218    | 96,383,570    |
| Treatment                               | 394,085,160        | 417,605,147   | 440,973,965   | 465,084,313   | 490,066,870   | 516,888,008   |
| Hospitalisation                         | 865,204,886        | 888,245,202   | 917,857,512   | 959,245,187   | 992,631,795   | 1,038,481,663 |
| Outpatient                              | 1,228,997,220      | 1,270,556,982 | 1,314,444,751 | 1,357,596,500 | 1,408,327,455 | 1,458,334,739 |
| Total                                   | 2,488,287,266      | 2,603,179,175 | 2,725,614,567 | 2,855,626,833 | 2,979,788,338 | 3,110,087,980 |
| <i>Budget impact</i>                    |                    |               |               |               |               |               |
| Case detection                          | 0                  | -26,771,844   | -52,338,339   | -73,700,833   | -88,762,218   | -96,383,570   |
| Treatment                               | 0                  | 51,179        | -939,274      | -3,338,118    | -7,467,781    | -12,885,388   |
| Hospitalisation                         | 0                  | 548,200       | 497,372       | 1,150,365     | 2,182,350     | 2,284,726     |
| Outpatient                              | 0                  | 308,109       | 1,536,799     | 3,255,691     | 5,257,846     | 6,586,609     |
| Total                                   | 0                  | -25,864,357   | -51,243,441   | -72,632,896   | -88,789,803   | -100,397,623  |

Table 3: Annual budget impact results for case detection strategy S1c.

| Outcome                                 | 2021<br>(Baseline) | 2022          | 2023          | 2024          | 2025          | 2026          |
|-----------------------------------------|--------------------|---------------|---------------|---------------|---------------|---------------|
| <i>No case detection strategy costs</i> |                    |               |               |               |               |               |
| Case detection                          | 0                  | 0             | 0             | 0             | 0             | 0             |
| Treatment                               | 394,085,160        | 417,656,325   | 440,034,691   | 461,746,194   | 482,599,088   | 504,002,620   |
| Hospitalisation                         | 865,204,886        | 888,793,402   | 918,354,884   | 960,395,553   | 994,814,145   | 1,040,766,389 |
| Outpatient                              | 1,228,997,220      | 1,270,865,091 | 1,315,981,550 | 1,360,852,191 | 1,413,585,302 | 1,464,921,348 |
| Total                                   | 2,488,287,266      | 2,577,314,818 | 2,674,371,125 | 2,782,993,938 | 2,890,998,535 | 3,009,690,357 |
| <i>Case detection strategy costs</i>    |                    |               |               |               |               |               |
| Case detection                          | 0                  | 33,502,161    | 65,562,911    | 92,312,444    | 111,207,751   | 120,817,576   |
| Treatment                               | 394,085,160        | 417,369,211   | 440,054,434   | 462,987,980   | 486,309,575   | 511,113,662   |
| Hospitalisation                         | 865,204,886        | 888,308,966   | 918,183,061   | 960,061,379   | 993,478,497   | 1,039,410,750 |
| Outpatient                              | 1,228,997,220      | 1,270,664,201 | 1,314,782,836 | 1,358,178,872 | 1,409,298,120 | 1,459,761,789 |
| Total                                   | 2,488,287,266      | 2,609,844,539 | 2,738,583,242 | 2,873,540,675 | 3,000,293,944 | 3,131,103,777 |
| <i>Budget impact</i>                    |                    |               |               |               |               |               |
| Case detection                          | 0                  | -33,502,161   | -65,562,911   | -92,312,444   | -111,207,751  | -120,817,576  |
| Treatment                               | 0                  | 287,115       | -19,742       | -1,241,786    | -3,710,487    | -7,111,043    |
| Hospitalisation                         | 0                  | 484,436       | 171,823       | 334,173       | 1,335,648     | 1,355,639     |
| Outpatient                              | 0                  | 200,890       | 1,198,714     | 2,673,319     | 4,287,182     | 5,159,559     |
| Total                                   | 0                  | -32,529,721   | -64,212,117   | -90,546,737   | -109,295,408  | -121,413,420  |

Table 4: Annual budget impact results for case detection strategy S2a.

| Outcome                                 | 2021<br>(Baseline) | 2022          | 2023          | 2024          | 2025          | 2026          |
|-----------------------------------------|--------------------|---------------|---------------|---------------|---------------|---------------|
| <i>No case detection strategy costs</i> |                    |               |               |               |               |               |
| Case detection                          | 0                  | 0             | 0             | 0             | 0             | 0             |
| Treatment                               | 394,085,160        | 417,656,325   | 440,034,691   | 461,746,194   | 482,599,088   | 504,002,620   |
| Hospitalisation                         | 865,204,886        | 888,793,402   | 918,354,884   | 960,395,553   | 994,814,145   | 1,040,766,389 |
| Outpatient                              | 1,228,997,220      | 1,270,865,091 | 1,315,981,550 | 1,360,852,191 | 1,413,585,302 | 1,464,921,348 |
| Total                                   | 2,488,287,266      | 2,577,314,818 | 2,674,371,125 | 2,782,993,938 | 2,890,998,535 | 3,009,690,357 |
| <i>Case detection strategy costs</i>    |                    |               |               |               |               |               |
| Case detection                          | 0                  | 16,468,918    | 32,700,712    | 47,510,047    | 60,006,493    | 69,363,873    |
| Treatment                               | 394,085,160        | 417,729,278   | 441,288,591   | 465,679,452   | 490,922,954   | 518,075,224   |
| Hospitalisation                         | 865,204,886        | 887,588,943   | 917,408,945   | 957,939,073   | 992,850,133   | 1,038,291,546 |
| Outpatient                              | 1,228,997,220      | 1,270,827,310 | 1,314,562,192 | 1,357,647,591 | 1,407,190,502 | 1,457,412,660 |
| Total                                   | 2,488,287,266      | 2,592,614,448 | 2,705,960,439 | 2,828,776,163 | 2,950,970,082 | 3,083,143,303 |
| <i>Budget impact</i>                    |                    |               |               |               |               |               |
| Case detection                          | 0                  | -16,468,918   | -32,700,712   | -47,510,047   | -60,006,493   | -69,363,873   |
| Treatment                               | 0                  | -72,952       | -1,253,900    | -3,933,257    | -8,323,866    | -14,072,605   |
| Hospitalisation                         | 0                  | 1,204,459     | 945,940       | 2,456,479     | 1,964,012     | 2,474,843     |
| Outpatient                              | 0                  | 37,781        | 1,419,357     | 3,204,600     | 6,394,799     | 7,508,688     |
| Total                                   | 0                  | -15,299,630   | -31,589,314   | -45,782,225   | -59,971,547   | -73,452,947   |

Table 5: Annual budget impact results for case detection strategy S3a.

| Outcome                                 | 2021<br>(Baseline) | 2022          | 2023          | 2024          | 2025          | 2026          |
|-----------------------------------------|--------------------|---------------|---------------|---------------|---------------|---------------|
| <i>No case detection strategy costs</i> |                    |               |               |               |               |               |
| Case detection                          | 0                  | 0             | 0             | 0             | 0             | 0             |
| Treatment                               | 394,085,160        | 417,656,325   | 440,034,691   | 461,746,194   | 482,599,088   | 504,002,620   |
| Hospitalisation                         | 865,204,886        | 888,793,402   | 918,354,884   | 960,395,553   | 994,814,145   | 1,040,766,389 |
| Outpatient                              | 1,228,997,220      | 1,270,865,091 | 1,315,981,550 | 1,360,852,191 | 1,413,585,302 | 1,464,921,348 |
| Total                                   | 2,488,287,266      | 2,577,314,818 | 2,674,371,125 | 2,782,993,938 | 2,890,998,535 | 3,009,690,357 |
| <i>Case detection strategy costs</i>    |                    |               |               |               |               |               |
| Case detection                          | 0                  | 11,016,653    | 21,275,147    | 29,592,076    | 35,074,130    | 37,568,301    |
| Treatment                               | 394,085,160        | 417,390,389   | 439,649,740   | 462,152,198   | 484,078,502   | 507,454,085   |
| Hospitalisation                         | 865,204,886        | 887,006,443   | 920,567,873   | 958,095,345   | 994,804,347   | 1,040,071,251 |
| Outpatient                              | 1,228,997,220      | 1,271,345,131 | 1,315,891,141 | 1,360,800,695 | 1,410,976,346 | 1,463,274,395 |
| Total                                   | 2,488,287,266      | 2,586,758,616 | 2,697,383,900 | 2,810,640,315 | 2,924,933,324 | 3,048,368,033 |
| <i>Budget impact</i>                    |                    |               |               |               |               |               |
| Case detection                          | 0                  | -11,016,653   | -21,275,147   | -29,592,076   | -35,074,130   | -37,568,301   |
| Treatment                               | 0                  | 265,936       | 384,952       | -406,004      | -1,479,413    | -3,451,466    |
| Hospitalisation                         | 0                  | 1,786,958     | -2,212,989    | 2,300,208     | 9,798         | 695,138       |
| Outpatient                              | 0                  | -480,040      | 90,408        | 51,495        | 2,608,956     | 1,646,953     |
| Total                                   | 0                  | -9,443,798    | -23,012,775   | -27,646,377   | -33,934,789   | -38,677,677   |

Table 6: Annual budget impact results for case detection strategy S3b.

| Outcome                                 | 2021<br>(Baseline) | 2022          | 2023          | 2024          | 2025          | 2026          |
|-----------------------------------------|--------------------|---------------|---------------|---------------|---------------|---------------|
| <i>No case detection strategy costs</i> |                    |               |               |               |               |               |
| Case detection                          | 0                  | 0             | 0             | 0             | 0             | 0             |
| Treatment                               | 394,085,160        | 417,656,325   | 440,034,691   | 461,746,194   | 482,599,088   | 504,002,620   |
| Hospitalisation                         | 865,204,886        | 888,793,402   | 918,354,884   | 960,395,553   | 994,814,145   | 1,040,766,389 |
| Outpatient                              | 1,228,997,220      | 1,270,865,091 | 1,315,981,550 | 1,360,852,191 | 1,413,585,302 | 1,464,921,348 |
| Total                                   | 2,488,287,266      | 2,577,314,818 | 2,674,371,125 | 2,782,993,938 | 2,890,998,535 | 3,009,690,357 |
| <i>Case detection strategy costs</i>    |                    |               |               |               |               |               |
| Case detection                          | 0                  | 15,149,413    | 29,168,195    | 40,534,328    | 48,151,651    | 51,581,576    |
| Treatment                               | 394,085,160        | 418,010,823   | 441,914,423   | 467,311,634   | 493,083,232   | 521,251,968   |
| Hospitalisation                         | 865,204,886        | 886,707,092   | 920,273,683   | 956,647,523   | 992,567,380   | 1,037,379,638 |
| Outpatient                              | 1,228,997,220      | 1,271,084,387 | 1,314,916,497 | 1,359,300,812 | 1,408,614,322 | 1,459,777,394 |
| Total                                   | 2,488,287,266      | 2,590,951,716 | 2,706,272,797 | 2,823,794,298 | 2,942,416,585 | 3,069,990,577 |
| <i>Budget impact</i>                    |                    |               |               |               |               |               |
| Case detection                          | 0                  | -15,149,413   | -29,168,195   | -40,534,328   | -48,151,651   | -51,581,576   |
| Treatment                               | 0                  | -354,498      | -1,879,732    | -5,565,440    | -10,484,144   | -17,249,349   |
| Hospitalisation                         | 0                  | 2,086,309     | -1,918,798    | 3,748,029     | 2,246,765     | 3,386,751     |
| Outpatient                              | 0                  | -219,296      | 1,065,053     | 1,551,379     | 4,970,980     | 5,143,954     |
| Total                                   | 0                  | -13,636,897   | -31,901,672   | -40,800,360   | -51,418,050   | -60,300,220   |

Table 7: Annual budget impact results for case detection strategy S3c.

| Outcome                                 | 2021<br>(Baseline) | 2022          | 2023          | 2024          | 2025          | 2026          |
|-----------------------------------------|--------------------|---------------|---------------|---------------|---------------|---------------|
| <i>No case detection strategy costs</i> |                    |               |               |               |               |               |
| Case detection                          | 0                  | 0             | 0             | 0             | 0             | 0             |
| Treatment                               | 394,085,160        | 417,656,325   | 440,034,691   | 461,746,194   | 482,599,088   | 504,002,620   |
| Hospitalisation                         | 865,204,886        | 888,793,402   | 918,354,884   | 960,395,553   | 994,814,145   | 1,040,766,389 |
| Outpatient                              | 1,228,997,220      | 1,270,865,091 | 1,315,981,550 | 1,360,852,191 | 1,413,585,302 | 1,464,921,348 |
| Total                                   | 2,488,287,266      | 2,577,314,818 | 2,674,371,125 | 2,782,993,938 | 2,890,998,535 | 3,009,690,357 |
| <i>Case detection strategy costs</i>    |                    |               |               |               |               |               |
| Case detection                          | 0                  | 11,862,684    | 22,933,817    | 31,883,149    | 37,834,395    | 40,536,614    |
| Treatment                               | 394,085,160        | 417,680,104   | 440,779,754   | 464,609,702   | 488,439,453   | 514,049,544   |
| Hospitalisation                         | 865,204,886        | 886,830,831   | 920,377,953   | 957,610,386   | 993,830,117   | 1,038,927,093 |
| Outpatient                              | 1,228,997,220      | 1,271,198,601 | 1,315,370,381 | 1,359,932,416 | 1,409,537,107 | 1,461,288,483 |
| Total                                   | 2,488,287,266      | 2,587,572,220 | 2,699,461,904 | 2,814,035,653 | 2,929,641,071 | 3,054,801,734 |
| <i>Budget impact</i>                    |                    |               |               |               |               |               |
| Case detection                          | 0                  | -11,862,684   | -22,933,817   | -31,883,149   | -37,834,395   | -40,536,614   |
| Treatment                               | 0                  | -23,779       | -745,063      | -2,863,508    | -5,840,364    | -10,046,924   |
| Hospitalisation                         | 0                  | 1,962,571     | -2,023,068    | 2,785,167     | 984,028       | 1,839,296     |
| Outpatient                              | 0                  | -333,510      | 611,169       | 919,775       | 4,048,195     | 3,632,865     |
| Total                                   | 0                  | -10,257,402   | -25,090,779   | -31,041,715   | -38,642,535   | -45,111,377   |

Table 8: Annual budget impact results for case detection strategy S3d.

| Outcome                                 | 2021<br>(Baseline) | 2022          | 2023          | 2024          | 2025          | 2026          |
|-----------------------------------------|--------------------|---------------|---------------|---------------|---------------|---------------|
| <i>No case detection strategy costs</i> |                    |               |               |               |               |               |
| Case detection                          | 0                  | 0             | 0             | 0             | 0             | 0             |
| Treatment                               | 394,085,160        | 417,656,325   | 440,034,691   | 461,746,194   | 482,599,088   | 504,002,620   |
| Hospitalisation                         | 865,204,886        | 888,793,402   | 918,354,884   | 960,395,553   | 994,814,145   | 1,040,766,389 |
| Outpatient                              | 1,228,997,220      | 1,270,865,091 | 1,315,981,550 | 1,360,852,191 | 1,413,585,302 | 1,464,921,348 |
| Total                                   | 2,488,287,266      | 2,577,314,818 | 2,674,371,125 | 2,782,993,938 | 2,890,998,535 | 3,009,690,357 |
| <i>Case detection strategy costs</i>    |                    |               |               |               |               |               |
| Case detection                          | 0                  | 14,513,907    | 28,077,627    | 38,986,891    | 46,347,700    | 49,631,396    |
| Treatment                               | 394,085,160        | 417,545,263   | 440,277,104   | 463,488,097   | 486,443,450   | 511,005,784   |
| Hospitalisation                         | 865,204,886        | 886,940,785   | 920,537,886   | 958,045,366   | 994,313,181   | 1,039,414,469 |
| Outpatient                              | 1,228,997,220      | 1,271,227,559 | 1,315,593,561 | 1,360,120,664 | 1,410,155,038 | 1,462,106,008 |
| Total                                   | 2,488,287,266      | 2,590,227,514 | 2,704,486,177 | 2,820,641,018 | 2,937,259,370 | 3,062,157,657 |
| <i>Budget impact</i>                    |                    |               |               |               |               |               |
| Case detection                          | 0                  | -14,513,907   | -28,077,627   | -38,986,891   | -46,347,700   | -49,631,396   |
| Treatment                               | 0                  | 111,062       | -242,412      | -1,741,903    | -3,844,362    | -7,003,164    |
| Hospitalisation                         | 0                  | 1,852,617     | -2,183,001    | 2,350,187     | 500,964       | 1,351,920     |
| Outpatient                              | 0                  | -362,468      | 387,989       | 731,527       | 3,430,264     | 2,815,340     |
| Total                                   | 0                  | -12,912,696   | -30,115,052   | -37,647,080   | -46,260,835   | -52,467,300   |

### Appendix 3: Recalibrating the cost-effectiveness plane

The cost-effectiveness plane used by Johnson *et al.* (2021) was recalibrated at lower willingness-to-pay (WTP) thresholds. The preferred case detection strategy using the efficiency frontier approach with a WTP threshold of \$25,000/QALY gained was S3b (questionnaire-based screening for adults aged  $\geq 50$  years with a smoking history) (Figure 5).

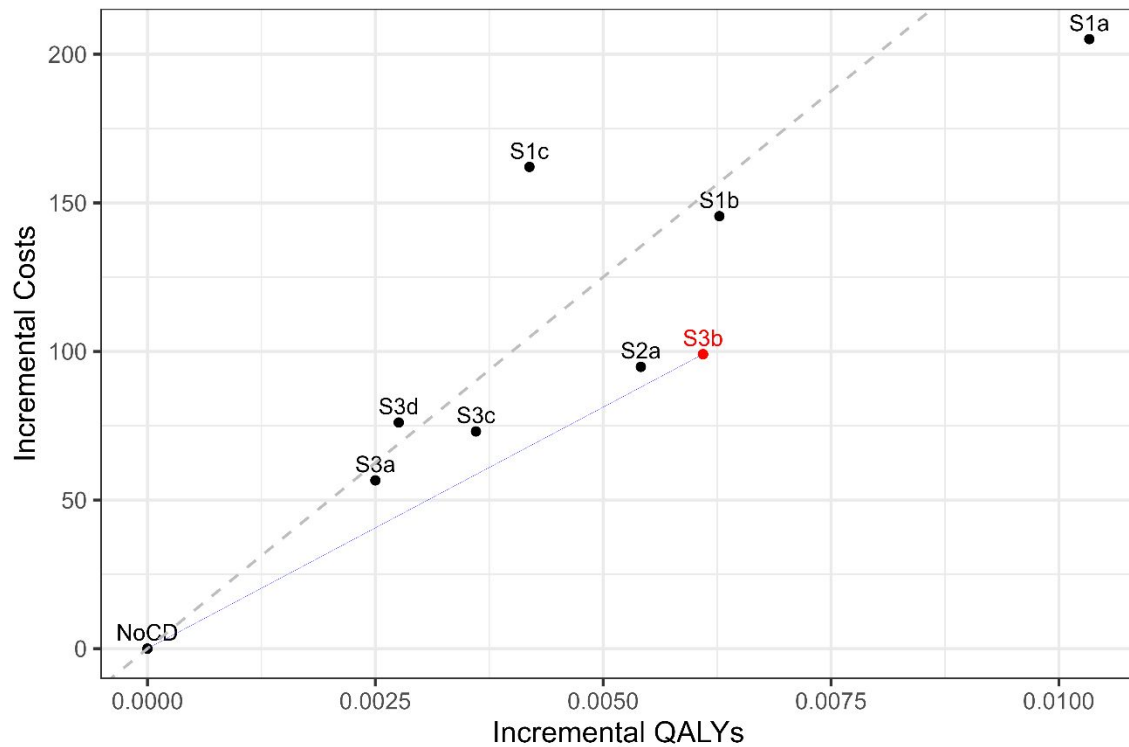

Figure 5: Cost-effectiveness plane for case detection scenarios. Solid blue line indicates the efficiency frontier and the grey dashed line indicated the WTP threshold (\$25,000/QALY gained). The highest value scenario is highlighted in red.

## References

1. Sadatsafavi M, Ghanbarian S, Adibi A, Johnson K, FitzGerald JM, Flanagan W, et al. Development and Validation of the Evaluation Platform in COPD (EPIC): A Population-Based Outcomes Model of COPD for Canada. *Medical Decision Making*. 2019 Feb; 39(2): 152-167.
2. Johnson KM, Sadatsafavi M, Adibi A, Lynd L, Harrison M, Tavakoli H, et al. Cost Effectiveness of Case Detection Strategies for the Early Detection of COPD. *Applied Health Economics and Health Policy*. 2021 Mar; 19(2): 203-215.
3. Statistics Canada. Population Projections for Canada, Provinces and Territories. [Online]. [cited 2022 December 1. Available from: <https://www150.statcan.gc.ca/n1/en/catalogue/91-520-X>.
4. Labonté LE, Tan WC, Li PZ, Mancino P, Aaron SD, Benedetti A, et al. Undiagnosed Chronic Obstructive Pulmonary Disease Contributes to the Burden of Health Care Use. Data from the CanCOLD Study. *American Journal of Respiratory and Critical Care Medicine*. 2016 Aug; 194(3): 285-298.
5. Bourbeau J, Tan WC, Benedetti A, Aaron SD, Chapman KR, Coxson HO, et al. Canadian Cohort Obstructive Lung Disease (CanCOLD): Fulfilling the Need for Longitudinal Observational Studies in COPD. *COPD: Journal of Chronic Obstructive Pulmonary Disease*. 2014 Apr; 11(2): 125-132.
6. Gershon AS, Thiruchelvam D, Chapman KR, Aaron SD, Stanbrook MB, Bourbeau J, et al. Health Services Burden of Undiagnosed and Overdiagnosed COPD. *Chest*. 2018 Jun; 153(6): 1336-1346.
